Letter

# Where is the western part of the Galactic Center Lobe located really?

Masato Tsuboi <sup>1,\*</sup>, Takahiro Tsutsumi <sup>2</sup>, Yoshimi Kitamura,<sup>1</sup>  
Ryosuke Miyawaki,<sup>3</sup> Atsushi Miyazaki,<sup>4</sup> and Makoto Miyoshi<sup>5</sup>

<sup>1</sup>Institute of Space and Astronautical Science, Japan Aerospace Exploration Agency, 3-1-1 Yoshinodai, Chuo-ku, Sagami-hara, Kanagawa 252-5210, Japan

<sup>2</sup>National Radio Astronomy Observatory, P.O.Box 0, Socorro, NM 87801-0387, USA

<sup>3</sup>College of Arts and Sciences, J.F. Oberlin University, 3758 Tokiwa-machi, Machida, Tokyo 194-0294, Japan

<sup>4</sup>Japan Space Forum, 3-2-1, Kandasurugadai, Kanda-surugadai, Chiyoda-ku, Tokyo 101-0062, Japan

<sup>5</sup>National Astronomical Observatory of Japan, 2-21-1 Osawa, Mitaka, Tokyo 181-8588, Japan

\*E-mail: [tsuboi@vsop.isas.jaxa.jp](mailto:tsuboi@vsop.isas.jaxa.jp)

Received 2020 June 30; Accepted 2020 July 17

## Abstract

The Galactic Center Lobe (GCL) is a peculiar object widely protruding from the Galactic plane toward the positive Galactic latitude, which had been found toward the Galactic Center (GC) in the early days of the radio observation. The peculiar shape has suggested a relation with historical events, star burst, large explosion, and so on in the GC. However, the issue of whether the GCL is a single large structure located in the GC region is not yet settled conclusively. In the previous observations, the silhouette against the low-frequency emission was found in the western part of the GCL (WPGCL); this suggests that the part is located in front of the GC region. On the other hand, the Local Standard of Rest (LSR) velocity of the radio recombination line toward it was found to be as low as  $0 \text{ km s}^{-1}$ . However, these observations cannot determine the exact position on the line-of-sight. There is still another possibility that it is in the near-side area of the GC region. In this analysis, we compare these results with the visual extinction map toward the GC. We found that the distribution of the visual extinction larger than 4 mag clearly corresponds to the silhouette of the WPGCL. The WPGCL must be located at most within a few kpc from us and not in the GC region. This would be a giant H II region in the Galactic disk.

**Key words:** dust, extinction — Galaxy: center — H II regions — ISM: clouds — ISM: molecules

## 1 Introduction

Peculiar objects have been observed toward the Galactic center (GC) region in wide wavelength regimes since the early days of the observation. Some of them are really

located in the GC region and they provide irreplaceable information for the investigation of the structure and activity of the region. However, the other objects are not really located in the GC region. Although the objects are

ordinary objects in the regions where they are really located, the misunderstanding that they are located in the GC makes them falsely identified as peculiar objects.

The Galactic Center Lobe (GCL) is a large-scale object found in the GC region (Sofue & Handa 1984). Its peculiar shape has suggested a relation with historical events, star burst, large explosion, and so on in the GC. However, it has also been advocated that the GCL is not a single large structure in the GC region, based on some circumstantial evidences. Especially, it is not yet settled conclusively where the western part of the GCL (WPGCL) is located in the line of sight (e.g., Tsuboi et al. 1986; Law et al. 2009; Nagoshi et al. 2019). Recently, new large radio telescopes at low frequency (MWA, MeerKAT, and so on) have started observing. The GC region has often been selected as their early observation targets. The peculiar shape of the GCL is imaged fascinatingly in their new maps (e.g., Heywood et al. 2019; Hurley-Walker et al. 2019). In these cases, improper discussions originating from the ambiguity of the location may waste our research resources. In order to dispel this anxiety, we attempt to solve this long-standing issue, making the best use of now-available data including the visual extinction ( $A_V$ ), in this Letter. Throughout this work, we adopt 8 kpc as the distance to the GC (e.g., Boehle et al. 2016);  $1''$  then corresponds to about 0.04 pc at that distance.

## 2 Existing observational results of the Galactic Center Lobe

The GCL has been observed by various telescopes since discovery. However, all the observational results obtained so far are not always consistent with each other. Here, we re-examine them.

### 2.1 Radio continuum images

Figure 1a shows the  $3^\circ \times 3^\circ$  continuum image at 10 GHz of the Galactic center region by the Nobeyama (NRO) 45 m telescope (Handa et al. 1987). The GCL had been found in the 10 GHz continuum image (Sofue & Handa 1984). The GCL is widely protruding from the Galactic plane toward the positive Galactic latitude as an  $\Omega$ -shaped structure (broken line curves). This figure also shows the linear polarized intensity at 10 GHz (contours). The eastern part of the GCL (EPGCL) overlaps the positive latitude part of the polarized plumes (or polarized lobes; PPs) (Tsuboi et al. 1985, 1986; Seiradakis et al. 1985). On the other hand, the WPGCL seems to be rooted around Sgr C (also see figure 1c). Figure 1b shows the image of the degree of linear polarization (DLP) at 10 GHz (Tsuboi et al. 1986). Although the galactic plane is not polarized except for several spots, a high DLP up to  $DLP > 25\%$  has been detected

in the PPs. The EPGCL is mainly a non-thermal structure. The degree of linear polarization in the WPGCL is very low;  $DLP < 2\%$ . The low DLP may be originated by Faraday depolarization of the foreground ionized gas, or the WPGCL may be the H II region in the near-side region of the GC.

Figure 1c shows the continuum image of the Galactic center region at 333 MHz by the Karl G. Jansky Very Large Array (VLA) (LaRosa et al. 2000). The vertical filaments (VFs) of the Galactic Center Arc (Yusef-Zadeh et al. 1984; Yusef-Zadeh & Morris 1987), threads (e.g., Morris & Yusef-Zadeh 1985), and the linear non-thermal filaments of Sgr C (Liszt 1985) are clearly seen in the figure. The VFs have also been observed to interact with the Galactic center molecular clouds (GCMCs) (e.g., Yusef-Zadeh & Morris 1987; Tsuboi et al. 1997). Both of the inside ends of PPs connect to both ends of the VFs, which are located in the GC region or at least in the vicinity of the region. Although the southernmost part of the WPGCL positionally corresponds to the linear filaments of Sgr C, the WPGCL has no close connection with the other Galactic center objects, including the GCMCs and so on. The figure has negative emission areas around the strong positive emission areas because of the shortage of the short-baseline data. Nevertheless, the WPGCL is not identified as either a faint emission nor a silhouette feature against the extended continuum emission of the GC (Rickert et al. 2014). This disappearance of the WPGCL may be caused by the intensity difference between the WPGCL and surrounding emission decreasing at this frequency. Note that the WPGCL is detected as an emission at  $\sim 1.3$  GHz (Heywood et al. 2019) and as a silhouette at  $\sim 150$  MHz (Hurley-Walker et al. 2019).

Figure 1d shows the continuum image of the Galactic center region at 74 MHz by VLA (Brogan et al. 2003). The WPGCL is detected as a curved silhouette feature against the continuum emission at 74 MHz. On the other hand, the EPGCL has no such feature except for a weak feature on the negative longitude side of the PPs (Nagoshi et al. 2019, also see figure 9 in Hurley-Walker et al. 2019). Because the large part of the continuum emission at 74 MHz would come from the GC region through the non-thermal process and the temperature of the ionized gas in the WPGCL is low compared with the brightness temperature of the background continuum emission, the silhouette feature suggests that the WPGCL is located in front of the GC region or at least on the near side of the region. This is consistent with other silhouette features of the foreground H II regions.

### 2.2 Ionized and molecular gas images

Figure 2a shows the image at  $8.3\mu\text{m}$  by the Mid-course Space Experiment (MSX) (Price et al. 2001). The contours indicate the silhouette features at 74 MHz

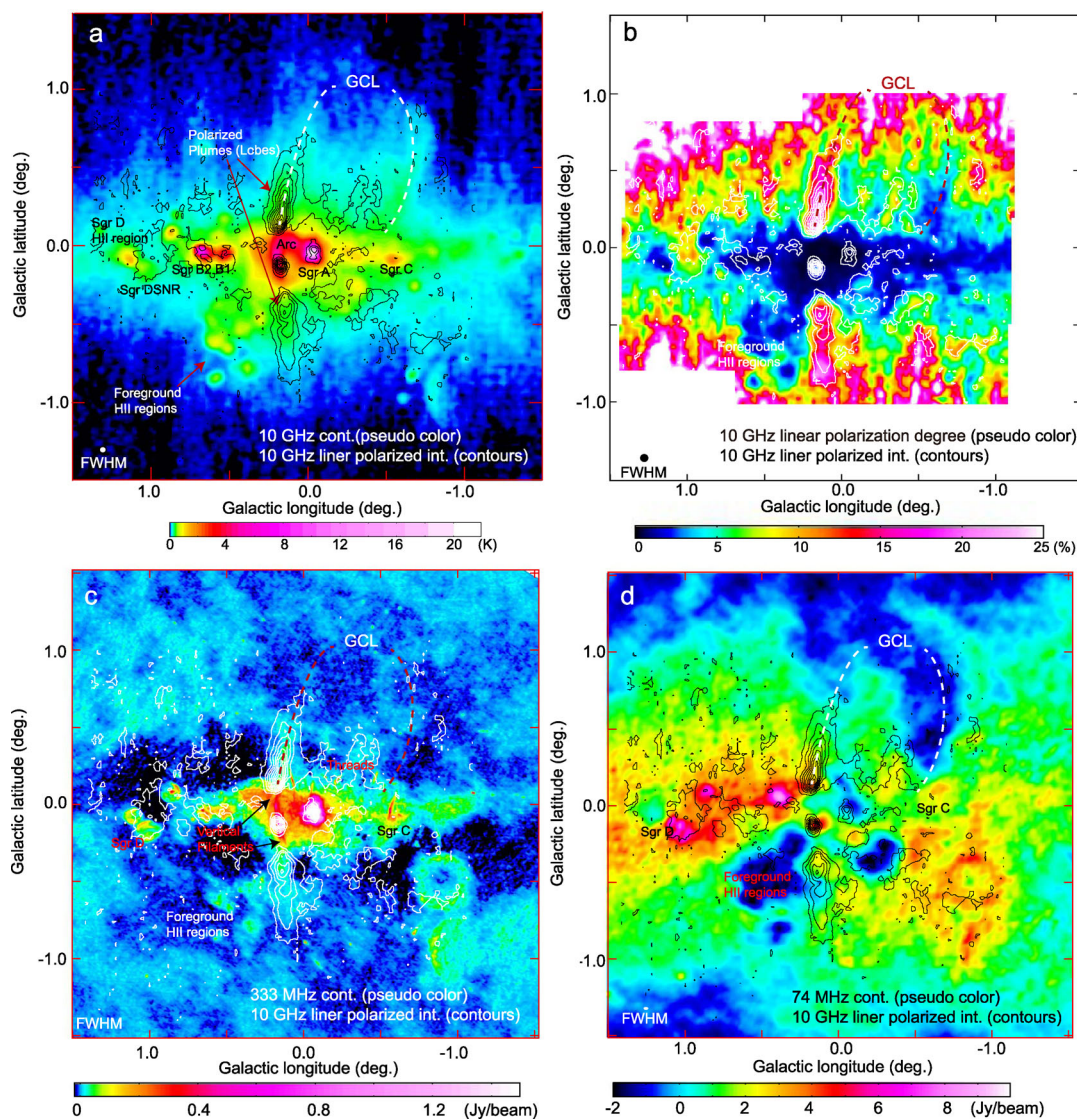

**Fig. 1.** (a)  $3^\circ \times 3^\circ$  continuum image at 10 GHz of the Galactic center region by the Nobeyama 45-m telescope (Handa et al. 1987). The beam size in FWHM is  $3' \times 3'$  shown in the bottom left-hand corner. The contours show the linear polarized intensity at 10 GHz (Tsuboi et al. 1986). The first contour and interval are both  $50 \text{ mJy beam}^{-1}$  ( $0.019 \text{ K}$  in  $T_B$ ). The broken line curves indicate the Galactic Center Lobe. (b) Image of the degree of linear polarization at 10 GHz (Tsuboi et al. 1986). (c) Continuum image at 333 MHz by VLA (LaRosa et al. 2000). The beam size in FWHM is  $43'' \times 24''$ ,  $PA = 65^\circ$  shown in the bottom left-hand corner. The  $1 \text{ Jy beam}^{-1}$  corresponds to  $10700 \text{ K}$  in  $T_B$ . (d) Continuum image at 74 MHz by VLA (Brogan et al. 2003). The beam size in FWHM is  $114'' \times 60''$  shown in the bottom left-hand corner. The  $1 \text{ Jy beam}^{-1}$  corresponds to  $32600 \text{ K}$  in  $T_B$ . (Color online)

(see figure 1d). The IR counterpart of the WPGCL can be identified (black arrow). This also corresponds to AFGL 5376, which is around  $l \sim -0.5$ ,  $b \sim 0.5$  in IR maps. Meanwhile, the EPGCL has no clear counterpart, although the “Double Helix Nebula” is identified (white arrow; Morris et al. 2006).

Figure 2b shows the comparison between the silhouette feature of the WPGCL at 74 MHz and the distribution of the  $\text{H}92\alpha$  radio recombination line (RRL) (Nagoshi et al. 2019). The Local Standard of Rest (LSR) velocity of the  $\text{H}92\alpha$  RRL is measured to be  $V_{\text{LSR}} \sim -4\text{--}10 \text{ km s}^{-1}$  (also see Law et al. 2009). The distribution of the RRL clearly corresponds to the silhouette feature (Nagoshi et al. 2019).

The velocity of  $\sim 0 \text{ km s}^{-1}$  in the WPGCL allows the possibility that it is in the area intervening between the GC and us, for example, foreground spiral arms. In addition, LSR velocity of the  $\text{H} 70\alpha$  RRL toward the Sgr C H II region has been observed to be  $V_{\text{LSR}} \sim -65 \text{ km s}^{-1}$  (Liszt & Spiker 1995). The Sgr C H II region is observed to be associated with the GMCs with around this velocity (e.g., Tsuboi et al. 1991; Liszt & Spiker 1995). The velocity is different from that of the RRL toward the WPGCL as mentioned above. This suggests that there is no physical connection between the WPGCL and Sgr C.

Figure 2c shows the integrated intensity map with the LSR velocity range of  $V_{\text{LSR}} = 120\text{--}130 \text{ km s}^{-1}$  in the CO



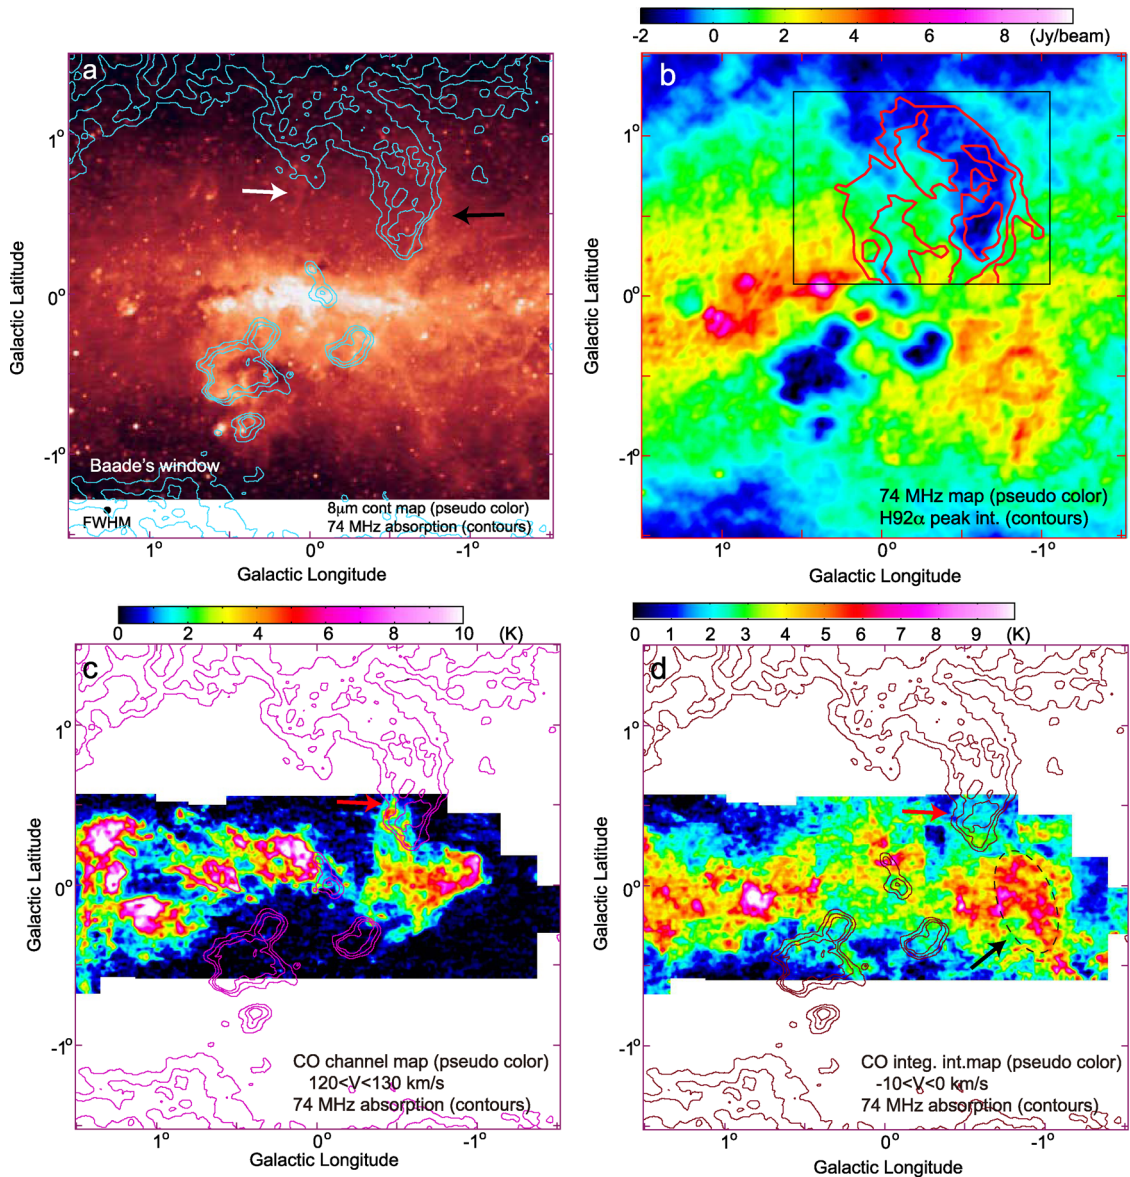

**Fig. 2.** (a)  $8\ \mu\text{m}$  image of the Galactic center region by Midcourse Space Experiment (Price et al. 2001). The contours show silhouette features against the continuum emission at 74 MHz. (b) Continuum image at 74 MHz by VLA (Brogan et al. 2003). The contours show the distribution of the H92 $\alpha$  radio recombination line (RRL) (Nagoshi et al. 2019). (c) Integrated intensity map with the velocity range of  $V_{\text{LSR}} = 120\text{--}130\ \text{km s}^{-1}$  in the CO  $J = 1\text{--}0$  emission line by the NRO 45-m telescope (Oka et al. 1998). The contours show silhouette features against the continuum emission at 74 MHz. (d) Integrated intensity map with the velocity range of  $V_{\text{LSR}} = -10\text{--}0\ \text{km s}^{-1}$  in the CO  $J = 1\text{--}0$  emission line. The contours show silhouette features against the continuum emission at 74 MHz. (Color online)

$J = 1\text{--}0$  emission line by the NRO 45 m telescope (Oka et al. 1998). The contours show the silhouette feature at 74 MHz. There is a molecular cloud positionally corresponding to the southernmost part of the WPGCL or AFGL 5376 (red arrow in figure 2c). The molecular cloud is identified in the velocity range of  $V_{\text{LSR}} \sim 110\text{--}140\ \text{km s}^{-1}$  (Uchida et al. 1990); see also Oka et al. 1998). The large positive velocity suggests that the molecular cloud is located in the GC region. However, the velocity is different from the velocity of the RRL toward the WPGCL,  $V_{\text{LSR}} \sim -4\text{--}10\ \text{km s}^{-1}$  (Nagoshi et al. 2019). This suggests that there is

no physical connection between the WPGCL and the molecular cloud. On the other hand, figure 2d shows the integrated intensity map with the velocity range of  $V_{\text{LSR}} = -10\text{--}0\ \text{km s}^{-1}$ . A faint molecular cloud in this channel map (red arrow) would exist around  $l \sim -0.5$ ,  $b \sim 0.5$  or the southernmost part of the WPGCL. The velocity of the molecular cloud is consistent with the velocity of the ionized gas in the WPGCL. The molecular cloud is extended up to  $b \sim 0.8$  (see figure 4 in Takeuchi et al. 2010). This is thought to be the counterpart of the WPGCL. Another molecular cloud is located around  $l = -0.8$ ,  $b = -0.2$  (broken

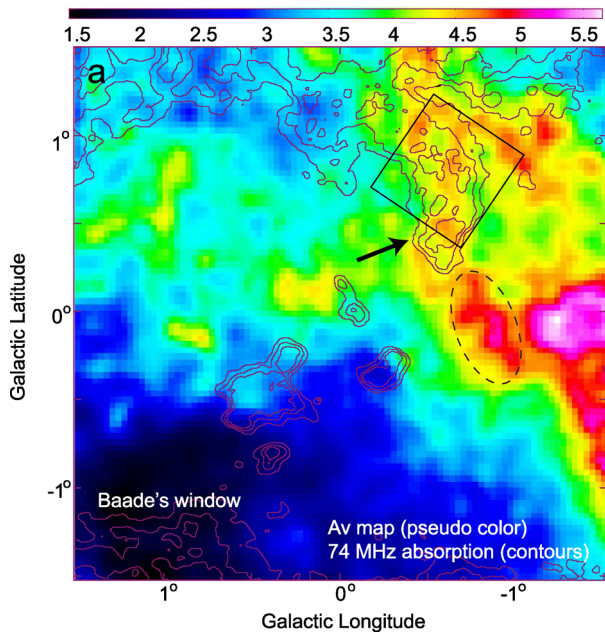

**Fig. 3.** Image of visual extinction,  $A_V$ , in the GC region based on the “Digitized Sky Survey” (pseudocolor, Dobashi et al. 2005). The contours show silhouette features against the continuum emission at 74 MHz (Brogan et al. 2003). The rectangle shows the map area of figure 4. (Color online)

line oval). This may be the negative latitude extension of the WPGCL.

### 3 Comparison with $A_V$ map

Figure 3 shows the  $A_V$  map of the GC region based on the “Digitized Sky Survey” (DSS) (pseudocolor, Dobashi et al. 2005). The contours show the silhouette features at 74 MHz. There is an  $A_V$  feature (black arrow) clearly corresponding to the silhouette of the WPGCL. The  $A_V$  feature and silhouette must be different aspects of the same object. The DSS is the survey observation using visible light. The containing stars are located at most within a few kpc from us toward the GC because the farther stars are not seen by strong visual extinction near the galactic plane. Therefore the object which makes the  $A_V$  feature must be located at most within a few kpc. That is, the WPGCL is not located in the nearside region of the GC because the distance to the GC is 8 kpc. In addition, another  $A_V$  feature connecting the WPGCL is located around  $l = -0^\circ 8$ ,  $b = -0^\circ 2$  (broken line oval). This feature is thought to be the CO negative latitude extension of the WPGCL as mentioned in the previous section.

The hydrogen column density is derived from the visual extinction,  $A_V$ , using the following formula (e.g., Güver & Özel 2009),

$$N_{\text{H}_1}[\text{cm}^{-2}] = 2.2 \times 10^{21} A_V[\text{mag}]. \quad (1)$$

The mean visual extinction of the  $A_V$  feature is measured to be  $\bar{A}_V \sim 4.5$  mag (see figure 3). The mean hydrogen column density is estimated to be  $\bar{N}_{\text{H}_1} = 1 \times 10^{22} \text{ cm}^{-2}$ . This is considered to be the mean hydrogen molecule column density of  $\bar{N}_{\text{H}_2} \sim 5 \times 10^{21} \text{ cm}^{-2}$ . On the other hand, the hydrogen molecule column density is also derived from the CO integrated intensity using the following formula (e.g., Bolatto et al. 2013):

$$N_{\text{H}_2}[\text{cm}^{-2}] = 2 \times 10^{20} \int T_{\text{MB}} dv [\text{K km s}^{-1}]. \quad (2)$$

The mean CO integrated intensity of the  $A_V$  feature is measured to be  $\int T_{\text{MB}} dv \sim 22 \text{ K km s}^{-1}$  (see figure 2d). The mean hydrogen molecule column density is estimated to be  $\bar{N}_{\text{H}_2} \sim 4.4 \times 10^{21} \text{ cm}^{-2}$ . This value is consistent with that from  $A_V$ . Assuming that the feature is located at  $D = 2$  kpc and the path length is the same as the width of the silhouette, the path length is  $d = 7$  pc. The hydrogen molecule density is estimated to be  $\bar{n}_{\text{H}_2} \sim \bar{N}_{\text{H}_2}/d = 200 \text{ cm}^{-3}$ . This value is higher than the “effective” critical density of the CO  $J = 1-0$  emission line, which is estimated to be  $n_{\text{H}_2, \text{CO, crit.}} \sim 100$  using the RADEX simulation (Van der Tak et al. 2007), but lower than that of the CS emission lines ( $n_{\text{H}_2, \text{CS, crit.}} \sim 10^4$ ). This is consistent with the fact that the feature is not identified in the channel maps of the CS emission lines (e.g.,  $J = 2-1$ ; Bally et al. 1987,  $J = 1-0$ ; Tsuboi et al. 1999). If the feature is located at  $D = 8$  kpc or in the GC, the hydrogen molecule density is estimated to be  $\bar{n}_{\text{H}_2} \sim 50 \text{ cm}^{-3}$ . This value is lower than the “effective” critical density of the CO  $J = 1-0$  emission line. The detection in the CO  $J = 1-0$  emission line would be inconsistent with the hydrogen molecule density.

The electron density,  $n_e$ , in the WPGCL is estimated from the continuum brightness temperature of  $T_B \sim 0.3$  K at 10 GHz (Handa et al. 1987), the electron temperature of  $T_e^* = 4200$  K (4400 K: Nagoshi et al. 2019; 4000 K: Law et al. 2009) and the path length of  $d = 7$  pc using the well-known formula which is given by (Altenhoff et al. 1960)

$$n_e[\text{cm}^{-3}] = \left\{ \frac{[T_B/\text{K}][T_e/\text{K}]^{0.35}[\nu/\text{GHz}]^{2.1}}{8.24 \times 10^{-2} a(\nu, T_e)[d/\text{pc}]} \right\}^{0.5}. \quad (3)$$

The correction factor is assumed to be  $a = 1$ . The electron density is derived to be  $n_e \sim 35 \text{ cm}^{-3}$ . The electron density and physical size ( $\sim 7 \text{ pc} \times \sim 35 \text{ pc}$ ) of the WPGCL are consistent with typical values of giant H II regions in the Galactic disk. Figure 4 shows the map of the WPGCL in the  $\text{H}\alpha$  emission line (656.28 nm) (Gaustad et al. 2001). The map area is shown as a rectangle in figure 3. We identify an  $\text{H}\alpha$  emission feature correlated with the northern half of the low-frequency absorption ( $b \gtrsim 0^\circ 8$ ) in the map.

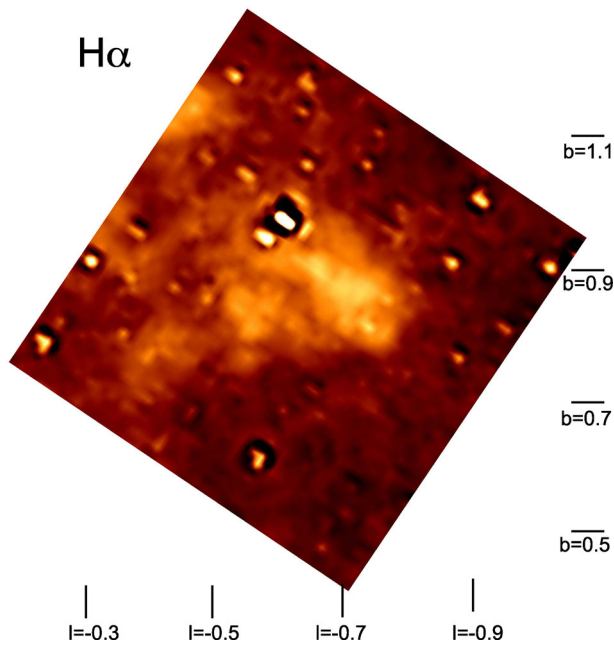

Fig. 4. Map of the western part of the GCL in the  $H\alpha$  emission (Gaustad et al. 2001). The map area is shown as a rectangle in figure 3. (Color online)

Because the  $H\alpha$  emission line is in visible light, this detection also indicates that the WPGCL is located in the region much nearer than the GC.

## Acknowledgments

This work is supported in part by the Grant-in-Aids from the Ministry of Education, Sports, Science and Technology (MEXT) of Japan, No.16K05308 and No.19K03939. We are grateful to Dr. C. L. Brogan at NRAO for providing the FITS file of the continuum data by VLA at 74 MHz. This paper is partly based on the  $A_v$  database by Prof. K. Dobashi at Tokyo Gakugei University. We thank him very much for providing the FITS file. This paper is partly based on the Southern H-Alpha Sky Survey Atlas.

## References

Altenhoff, W., et al. 1960, Veröff. d. Sternw. Bonn, Nr. 59  
 Bally, J., Stark, A. A., Wilson, R. W., & Henkel, C. 1987, ApJS, 65, 13  
 Boehle, A., et al. 2016, ApJ, 830, 17

Bolato, A. D., Wolfire, M., & Leroy, A. K. 2013, ARA&A, 51, 207  
 Brogan, C. L., Nord, M., Kassim, N., Lazio, J., & Anantharamaiah, K. 2003, Astron. Nachr. Supp., 324, 17  
 Dobashi, K., Uehara, H., Kandori, R., Sakurai, T., Kaiden, M., Umemoto, T., & Sato, F. 2005, PASJ, 57, S1  
 Gaustad, J. E., McCullough, P. R., Rosing, W., & Van Buren, D. 2001, PASP, 113, 1326  
 Güver, T., & Özel, F. 2009, MNRAS, 400, 2050  
 Handa, T., Sofue, Y., Nakai, N., Hirabayashi, H., & Inoue, M. 1987, PASJ, 39, 709  
 Heywood, I., et al. 2019, Nature, 573, 235  
 Hurley-Walker, N., et al. 2019, PASA, 36, e047  
 LaRosa, T. N., Kassim, N. E., Lazio, T. J. W., & Hyman, S. D. 2000, AJ, 119, 207  
 Law, C. J., Backer, D., Yusef-Zadeh, F., & Maddalena, R. 2009, ApJ, 695, 1070  
 Liszt, H. S. 1985, ApJ, 293, L65  
 Liszt, H. S., & Spiker, R. W. 1995, ApJS, 98, 259  
 Morris, M., & Yusef-Zadeh, F. 1985, AJ, 90, 2511  
 Morris, M., Uchida, K., & Do, T. 2006, Nature, 440, 308  
 Nagoshi, H., et al. 2019, PASJ, 71, 80  
 Oka, T., Hasegawa, T., Sato, F., Tsuboi, M., & Miyazaki, A. 1998, ApJS, 118, 455  
 Price, S. D., Egan, M. P., Carey, S. J., Mizuno, D. R., & Kuchar, T. A. 2001, AJ, 121, 2819  
 Rickert, M., Yusef-Zadeh, F., & Brogan, C. 2014, in IAU Symp. 303, The Galactic Center: Feeding and Feedback in a Normal Galactic Nucleus, ed. L. O. Sjouwerman et al. (Cambridge: Cambridge University Press), 464  
 Seiradakis, J. H., Lasenby, A. N., Yusef-Zadeh, F., Wielebinski, R., & Klein, U. 1985, Nature, 317, 697  
 Sofue, Y., & Handa, T. 1984, Nature, 310, 568  
 Takeuchi, T., et al. 2010, PASJ, 62, 557  
 Tsuboi, M., Inoue, M., Handa, T., Tabara, H., & Kato, T. 1985, PASJ, 37, 359  
 Tsuboi, M., Inoue, M., Handa, T., Tabara, H., Kato, T., Sofue, Y., & Kaifu, N. 1986, AJ, 92, 818  
 Tsuboi, M., Kobayashi, H., Ishiguro, M., & Murata, Y. 1991, PASJ, 43, L27  
 Tsuboi, M., Ukita, N., & Handa, T. 1997, ApJ, 481, 263  
 Tsuboi, M., Handa, T., & Ukita, N. 1999, ApJS, 120, 1  
 Uchida, K., Morris, M., & Serabyn, E. 1990, ApJ, 351, 443  
 van der Tak, F. F. S., Black, J. H., Schöier, F. L., Jansen, D. J., & van Dishoeck, E. F. 2007, A&A, 468, 627  
 Yusef-Zadeh, F., & Morris, M. 1987, AJ, 94, 1178  
 Yusef-Zadeh, F., Morris, M., & Chance, D. 1984, Nature, 310, 557
